# Supplementary material for: Motor Matters: Tackling Heterogeneity of Parkinson’s Disease in Functional MRI Studies
Source: PubMed Central journal article supplement (PMC3572025; doi:10.1371/journal.pone.0056133), 2013-02-13
Supplement: pone.0056133.s001.pdf [file pone.0056133.s001.pdf]

**Supplementary Table S1.**

|    |               |   |               | UPDRS-III*    |              |              |              |               |               |              |              |              |              |              |              |              |              |              |              |              |              |              |              |
|----|---------------|---|---------------|---------------|--------------|--------------|--------------|---------------|---------------|--------------|--------------|--------------|--------------|--------------|--------------|--------------|--------------|--------------|--------------|--------------|--------------|--------------|--------------|
|    |               |   |               | Total         |              | Midline      |              | Hemibody      |               |              |              | Akinesia     |              |              |              | Rigidity     |              |              |              | Tremor       |              |              |              |
|    |               |   |               | off           | on           | off          | on           | off           | on            | L            | R            | L            | R            | L            | R            | L            | R            | L            | R            | L            | R            | L            | R            |
| ID | Age           | G | DD            | -             | -            | -            | -            | L             | R             | L            | R            | L            | R            | L            | R            | L            | R            | L            | R            | L            | R            | L            | R            |
| 1  | 63            | M | 15            | 21            | 5            | 4            | 1            | 7             | 7             | 2            | 1            | 4            | 1            | 1            | 0            | 3            | 4            | 1            | 1            | 1            | 2            | 0            | 0            |
| 2  | 53            | M | 11            | 45            | 9            | 8            | 2            | 17            | 12            | 2            | 2            | 13           | 8            | 1            | 0            | 3            | 3            | 0            | 1            | 1            | 1            | 1            | 1            |
| 3  | 46            | M | 15            | 40            | 13           | 9            | 3            | 11            | 12            | 3            | 4            | 8            | 9            | 3            | 4            | 3            | 3            | 0            | 0            | 0            | 0            | 0            | 0            |
| 4  | 64            | M | 14            | 31            | 2            | 4            | 1            | 11            | 13            | 1            | 0            | 9            | 6            | 1            | 0            | 1            | 2            | 0            | 0            | 1            | 5            | 0            | 0            |
| 5  | 58            | M | 11            | 26            | 11           | 4            | 3            | 6             | 9             | 2            | 4            | 4            | 4            | 1            | 2            | 2            | 4            | 0            | 1            | 1            | 1            | 1            | 1            |
| 6  | 49            | M | 9             | 21            | 9            | 3            | 2            | 10            | 5             | 4            | 2            | 8            | 4            | 4            | 2            | 1            | 1            | 0            | 0            | 1            | 0            | 1            | 0            |
| 7  | 64            | M | 14            | 37            | 11           | 5            | 1            | 8             | 17            | 2            | 6            | 6            | 11           | 2            | 5            | 1            | 4            | 0            | 1            | 1            | 2            | 0            | 0            |
| 8  | 53            | M | 12            | 37            | 11           | 3            | 2            | 18            | 11            | 4            | 4            | 11           | 7            | 3            | 3            | 3            | 2            | 0            | 0            | 4            | 2            | 1            | 1            |
| 9  | 59            | M | 9             | 26            | 6            | 4            | 2            | 12            | 5             | 1            | 0            | 8            | 4            | 0            | 0            | 4            | 1            | 1            | 0            | 0            | 0            | 0            | 0            |
| 10 | 45            | M | 14            | 47            | 21           | 9            | 4            | 17            | 13            | 7            | 6            | 10           | 7            | 5            | 3            | 6            | 5            | 1            | 2            | 2            | 1            | 1            | 1            |
| 11 | 64            | M | 13            | 31            | 10           | 5            | 3            | 11            | 10            | 3            | 2            | 6            | 3            | 1            | 0            | 3            | 4            | 1            | 1            | 2            | 3            | 1            | 1            |
| 12 | 53            | M | 12            | 43            | 10           | 8            | 3            | 11            | 17            | 2            | 4            | 7            | 11           | 1            | 2            | 3            | 5            | 0            | 1            | 1            | 1            | 1            | 1            |
| -  | 55.9<br>(6.8) | - | 12.4<br>(2.0) | 33.8<br>(8.7) | 9.8<br>(4.5) | 5.5<br>(2.2) | 2.3<br>(0.9) | 11.6<br>(3.8) | 10.9<br>(3.8) | 2.8<br>(1.6) | 2.9<br>(2.0) | 7.8<br>(2.6) | 6.3<br>(3.0) | 1.9<br>(1.4) | 1.8<br>(1.7) | 2.8<br>(1.4) | 3.2<br>(1.3) | 0.3<br>(0.5) | 0.7<br>(0.6) | 1.3<br>(1.0) | 1.5<br>(1.4) | 0.6<br>(0.5) | 0.5<br>(0.5) |

**Supplementary Table S1.** The demographic and clinical characteristics of patients involved in the study. UPDRS-III\* - Motor part of Unified Parkinson’s Disease Rating Scale. G: gender. DD: duration of the disease (years). OFF: without levodopa medication. ON: with levodopa medication. L: left hemibody. R: right hemibody. The last row displays the average and standard deviation as: mean (SD).
